# Supplementary material for: Optimality and cooperativity in superselective surface binding by multivalent DNA nanostars
Source: Royal Society of Chemistry journal article supplement (doi:10.1039/d4sm00704b), 2024-01-01
Supplement: d4sm00704b1.pdf [file d4sm00704b1.pdf]

Cite this: DOI: 00.0000/xxxxxxxxxx

## Supplemental Information: Optimality and cooperativity in superselective surface binding by multivalent DNA nanostars

Christine Linne,<sup>a,b</sup> Eva Heemskerk,<sup>a</sup> Jos W. Zwanikken,<sup>a</sup> Daniela J. Kraft<sup>b\*</sup>, and Liedewij Laan<sup>a\*</sup>

Received Date

Accepted Date

DOI: 00.0000/xxxxxxxxxx

<sup>a</sup> Department of Bionanoscience, TU Delft, 2629 HZ Delft, The Netherlands

<sup>b</sup> Soft Matter Physics, Huygens-Kamerlingh Onnes Laboratory, Leiden Institute of Physics, 2300 RA Leiden, The Netherlands

\* To whom correspondence should be addressed. E-mail: l.laan@tudelft.nl; kraft@Physics.LeidenUniv.nl

## Derivation of the average number of bound ligands

Equation 6 in the manuscript describes the average number of bound ligands of a DNA nanostar, given that the particle is bound to the substrate (so that at least one ligand is bound).

The internal partition function of a single DNA nanostar, bound at the surface, is given by

$$Q = \sum_{m=0}^{k-1} \binom{k-1}{m} x^m, \quad (1)$$

with  $m$  representing the number of bound ligands beyond the first, and  $x \equiv e^{\beta(\mu-\varepsilon)} = \sigma_{\text{R}} A K_{\text{intra}}$ , using the analogy between the (equilibrium) rate constant  $K_{\text{intra}}$ , and potential energy difference  $\varepsilon$  between the unbound state and bound state of a ligand-receptor pair. For the chemical potential difference, we use the ideal gas approximation  $\mu = k_{\text{B}} T \ln A \sigma_{\text{R}}$  which should break down at high densities of receptors, or when the number of free receptors is smaller than the total number of receptors, such that one can no longer speak of an effective ‘reservoir’ (with constant chemical potential) of receptors. However, this assumption holds well here because the particles bind weakly and reversibly (a condition for superselectivity) such that the number of free receptors is always close to the total number of receptors. The simulations work with explicit receptors and do not depend on this assumption, and confirm that the fraction of free receptors is larger than 0.95. Only for very superselective particles ( $\alpha \geq 5$ ) did we observe a significant drop in the relative number of free receptors.

The expectation value  $\langle n \rangle$  of the number of bound ligands, given that a particle is bound with at least one ligand, is now found by

$$\langle n \rangle = 1 + \frac{\sum_{m=0}^{k-1} m \binom{k-1}{m} x^m}{\sum_{m=0}^{k-1} \binom{k-1}{m} x^m}, \quad (2)$$

which is equal to

$$1 + \frac{\partial \ln Q}{\partial \ln x} = 1 + \frac{(k-1)x}{1+x}. \quad (3)$$

After substitution, one obtains equation 6 from the manuscript

$$\langle n \rangle = 1 + \frac{k-1}{1 + (\sigma_{\text{R}} A K_{\text{intra}})^{-1}} \quad (4)$$

This expression shows that the average number of bound arms is only dependent on  $K_{\text{intra}}$  and not on  $K_{\text{A}}$ . Furthermore, via simulations and an analytical derivation we found a useful approximation

$$\alpha \approx \langle n \rangle (1 - \Theta) \quad (5)$$

Therefore, one can interpret  $\langle n \rangle$  as an effective Hill-coefficient, equal to  $\alpha$  as long as there is no saturation. Hence, the rate constant  $K_{\text{intra}}$  determines the surface concentration where the particles start to bind with multiple arms (and become superselective), while the rate constant  $K_{\text{A}}$  needs to be sufficiently low, to delay saturation effects. These insights are based on the simple model, where the ligands act independently. We did observe that the convenient estimation, Equation 5, breaks down if  $\Delta G_{\text{c}} \gg 1$ , although not dramatically.

## Methods

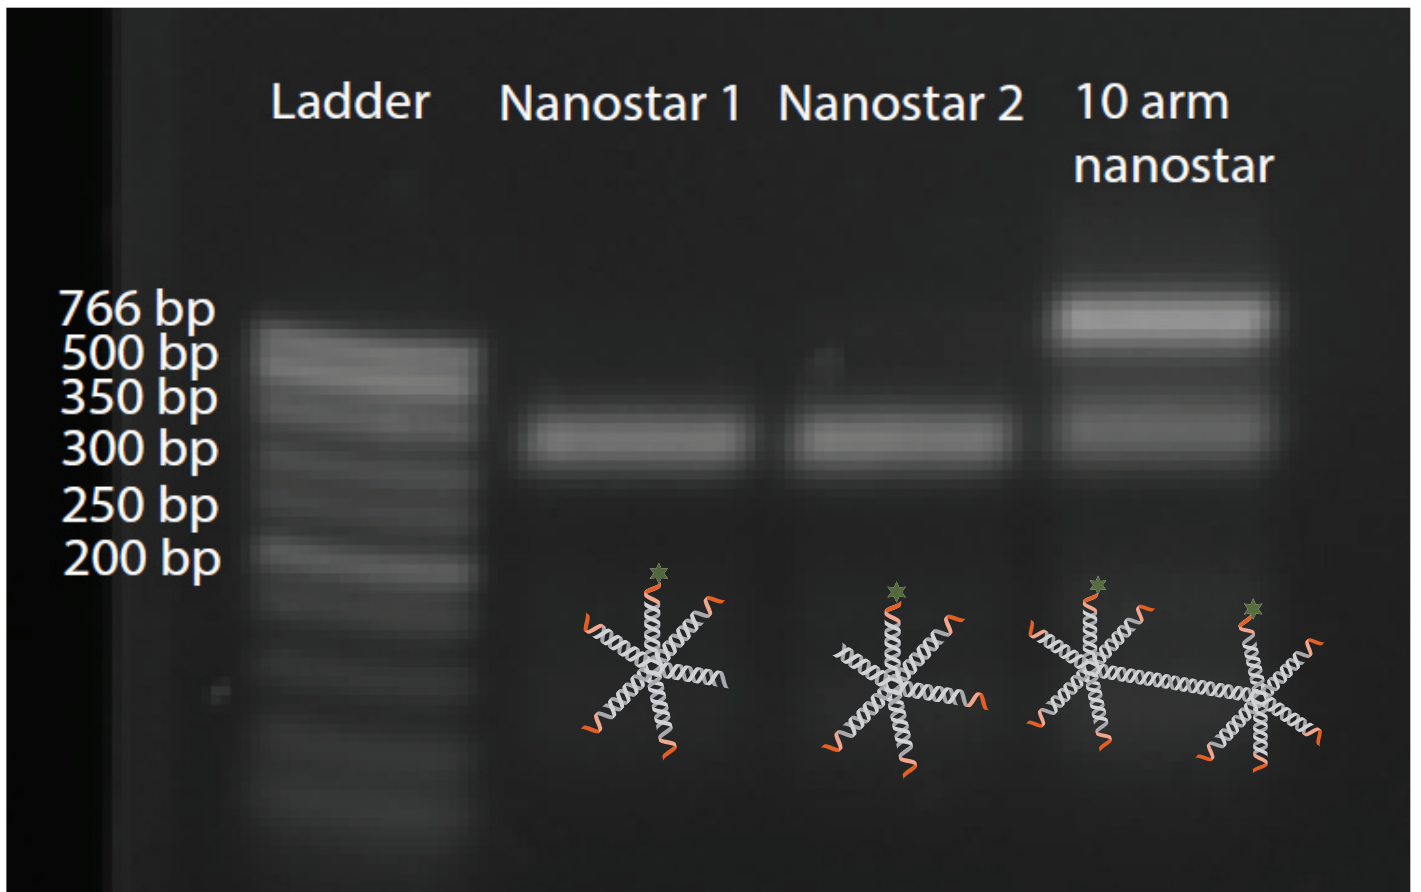

Fig. 1 DNA nanostar design DNA electrophoresis allows for the visualization of the final DNA star products after hybridization. The first lane shows the ladder. The second and third lane show the two different hybridized 6 arms nanostars that are subsequently hybridized together with a linker to form a 10 arm nanostar, which is shown in the fourth lane. The fluorescent bands shift upwards and confirm the formation of a larger DNA nanostructure. The lower band in the fourth lane shows there are some 6 arm DNA nanostars present but the majority is hybridized in a 10 arm DNA nanostar.

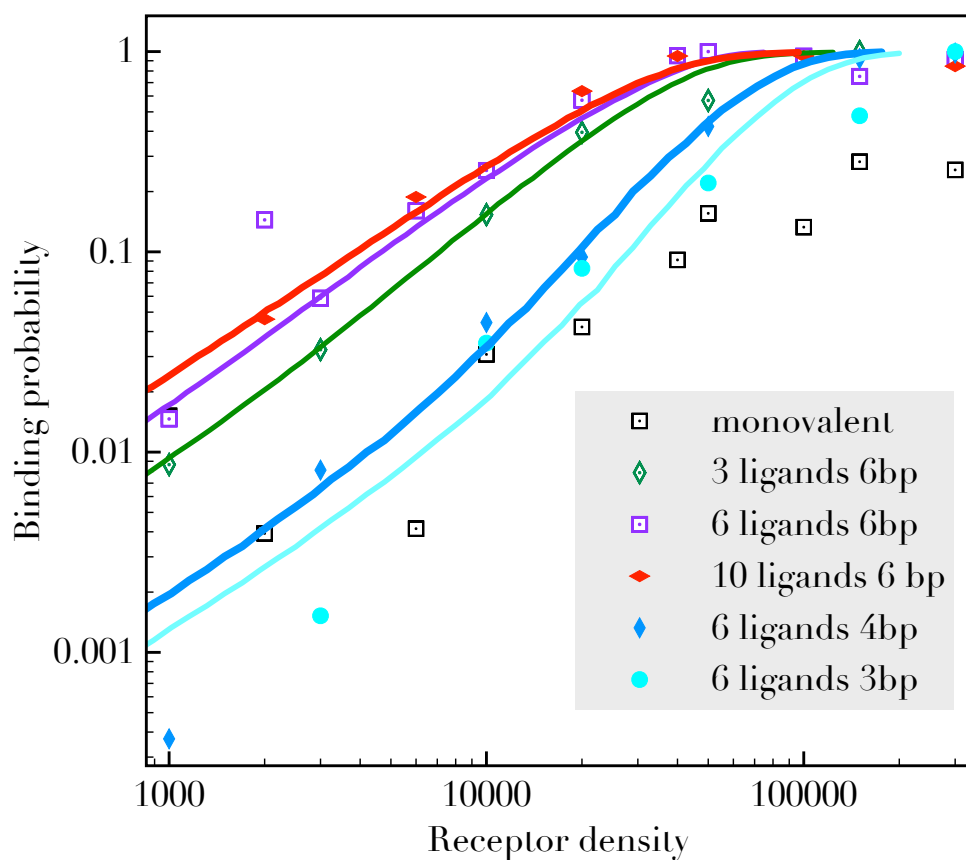

Fig. 2 The binding probability as a function of receptor density for three types of DNA nanostars with identical ligands (6 basepairs) but different valency (3, 6 and 10), and two types of nanostars with valency 6 and shorter sticky ends (3 and 4 basepairs). The symbols represent the experimental data and the curves are simulation results, using the same  $K_{\text{intra}}$  and  $K_A = 3 \cdot 10^{-5} \text{ M}^{-1}$  for the curves with 6 bp, representing identical on- and off-rates, but with different  $\Delta G_c$ , representing a different pair-interaction between the ligands. Best fits were obtained with values  $K_{\text{intra}} = 1.4 \cdot 10^{-11}$ ,  $K_A = 1 \cdot 10^{-6} \text{ M}^{-1}$  and  $\Delta G_c = -0.5, 0, 1$  for the nanostars with 3, 6, and 10 ligands, respectively. The parameters would imply that DNA nanostars with a higher valency experience more competition in the binding process. The data of the nanostars with shorter ligands were fitted with the same  $K_{\text{intra}}/K_A$  ratio, but with  $K_{\text{intra}} = 9 \cdot 10^{-12}$ ,  $K_A = 7 \cdot 10^{-7} \text{ M}^{-1}$  (4 bp) and  $K_{\text{intra}} = 4 \cdot 10^{-12}$ ,  $K_A = 3 \cdot 10^{-7} \text{ M}^{-1}$  (3 bp), while  $\Delta G_c = 0$  for all nanoparticles with 6 ligands.

| Name                | Sequence (5' to 3')                                                                         | 5'              | 3'              |
|---------------------|---------------------------------------------------------------------------------------------|-----------------|-----------------|
| X 1                 | CTACTATGGCGGGTGATAAAAAA<br>CGGGAAGAGCATGCCCATCCA-sticky end                                 | -               | ATTO488         |
| X 2                 | GGATGGGCATGCTCTTCCCGAAAA<br>CTCAACTGCCTGGTGATACGA-sticky end                                | -               | -               |
| X 3                 | CGTATCACCAGGCAGTTGAGAAAA<br>TTTATCACCCGCCATAGTAGA-sticky end                                | -               | -               |
| X 4                 | GTATCACCAGGCAGTTGAGAAAA<br>CATGCGAGGGTCCAATACCGA-sticky end                                 | -               | -               |
| X 5                 | CGGTATTGGACCCTCGCATGAAAA<br>TTTATCACCCGCCATAGTAGA-sticky end                                | -               | -               |
| X 6                 | CGGTATTGGACCCTCGCATGAAAA<br>CCATGCTGGACTCAACTGACA-sticky end                                | -               | -               |
| X 7                 | GTCAGTTGAGTCCAGCATGGAAAA<br>TTTATCACCCGCCATAGTAGA-sticky end                                | -               | -               |
| X 8                 | GTCAGTTGAGTCCAGCATGGAAAA<br>CGCATCAGTTGCGGCGCCGCA-sticky end                                | -               | -               |
| X 9                 | GCGGCGCCGCAACTGATGCGAAAA<br>TTTATCACCCGCCATAGTAGA-sticky end                                | -               | -               |
| Inert strand A      | CGTAAGGCAGGGCTCTCTAGATTGACTGTGCGAAGGGTAGCGATTTT                                             | -               | Cholesterol-TEG |
| Inert strand B      | TTTATCGCTACCCCTTCGCACAGTCAATCTAGAGGCCCTGCCTTACGA                                            | Cholesterol-TEG | -               |
| receptor backbone   | TCGTAAGGCAGGGCTCTCTAGACAGGGCTCTCTGAATGTGACTGTGC<br>GAAGGTGACTGTGCGAAGGGTAGCGATTTT           | -               | Cholesterol-TEG |
| receptor            | TTTATCGCTACCCCTTCGCACAGTCACTTCGCACAGTCA<br>CATTAGAGAGCCCTGTCTAGAGAGCCCTGCCTTACGA-sticky end | Cholesterol-TEG | Cy3             |
| X sticky end        | GTAG, GTGATT                                                                                | -               | -               |
| receptor sticky end | CTAC, AATCAC                                                                                | -               | -               |
| X bridge A          | GGATGGGCATGCTCTTCCCGAAAACTCAACTGC<br>CTGGTGATACGTCCACCAATCCACTAATCCT                        | -               | -               |
| X bridge B          | GGATGGGCATGCTCTTCCCGAAAACTCAACTG<br>CCTGGTGATACGAGGATTAGTGGATTGGTGG                         | -               | -               |

Table 1 DNA sequences The DNA strands labelled with X form the DNA nanostars. The number of strands and sticky ends define the geometry and valency of the nanostar. Inert strand A and inert strand B are the two components for the dsDNA used as inert strands. The hybridization of receptor backbone and receptor yields the receptor with a sticky end. To click two DNA nanostars together, the strands X bridge A and X bridge B in combination with the regular nanostar strands X generate a nanostar with valencies larger than 6.

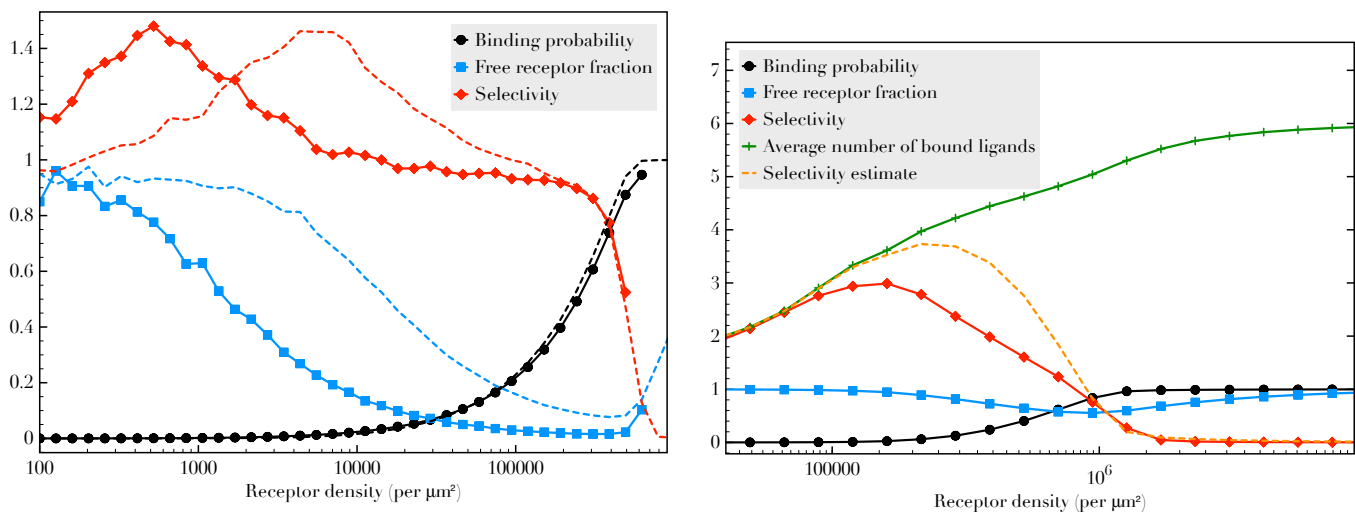

Fig. 3 Upper figure: Binding probability (black circle), fraction of receptors that is unbound (blue square) and selectivity (red diamond) as a function of the total receptor density, from stochastic simulations of the binding events. The dashed curves show the same quantities, but for a different  $K_{\text{intra}}$ , being  $4.6 \cdot 10^{-10}$  for the continuous curves, and  $4.6 \cdot 10^{-11}$  for the dashed curves. For these values  $\sigma_R A K_{\text{intra}} = 1$  if  $\sigma_R^* = 10^3$  and  $10^4$ , respectively, showing that the selectivity tends to peak at this receptor concentration (where the particles start binding with multiple arms). The constant  $K_A = 3 \cdot 10^{-5} \text{ M}^{-1}$ . These parameters corresponded best with the experimental data, except for the saturation point, which was observed around  $\sigma_R = 10^4$ . At this concentration, 60% of the receptors is unbound. The lower figure illustrates the relation between the selectivity and average number of bound arms, by showing the average number of bound ligands per bound nanostar (Equation 6 in the manuscript and 4 in this document) in green with + symbols. In the lower figure  $K_{\text{intra}} = 4.6 \cdot 10^{-12}$  and  $K_A = 3 \cdot 10^{-7} \text{ M}^{-1}$ . The orange dashed line is the estimated selectivity using  $\alpha \approx \langle n \rangle (1 - \Theta)$ . This approximation is more accurate if the drop in selectivity is caused by the saturation of the surface (lower figure) rather than the relative depletion of receptors (upper figure). In the upper figure, the four binding regimes can be distinguished: 1) at low densities, the nanostars are not superselective and bind on average with one ligand 2) the superselective regime, where the nanostars start binding with multiple arms,  $\sigma_R A K_{\text{intra}} \approx 1$ , 3) The regime where the selectivity drops due to nonlinear binding with receptors, and 4) the regime where the surface is fully covered or where all the nanostars are bound, where the selectivity drops to zero.
